# Supplementary material
Source: PubMed Central journal article supplement (PMC8531137)
Supplement: mmc1.pdf [file mmc1.pdf]

## **Supplemental Information**

**Hypoxia-induced IncHILAR promotes renal cancer**

**metastasis via ceRNA for the miR-613/206/**

**1-1-3p/Jagged-1/Notch/CXCR4 signaling pathway**

**Guanghai Hu, Junjie Ma, Jin Zhang, Yonghui Chen, Huan Liu, Yiran Huang, Junhua Zheng, Yunfei Xu, Wei Xue, and Wei Zhai**

# Figure S1

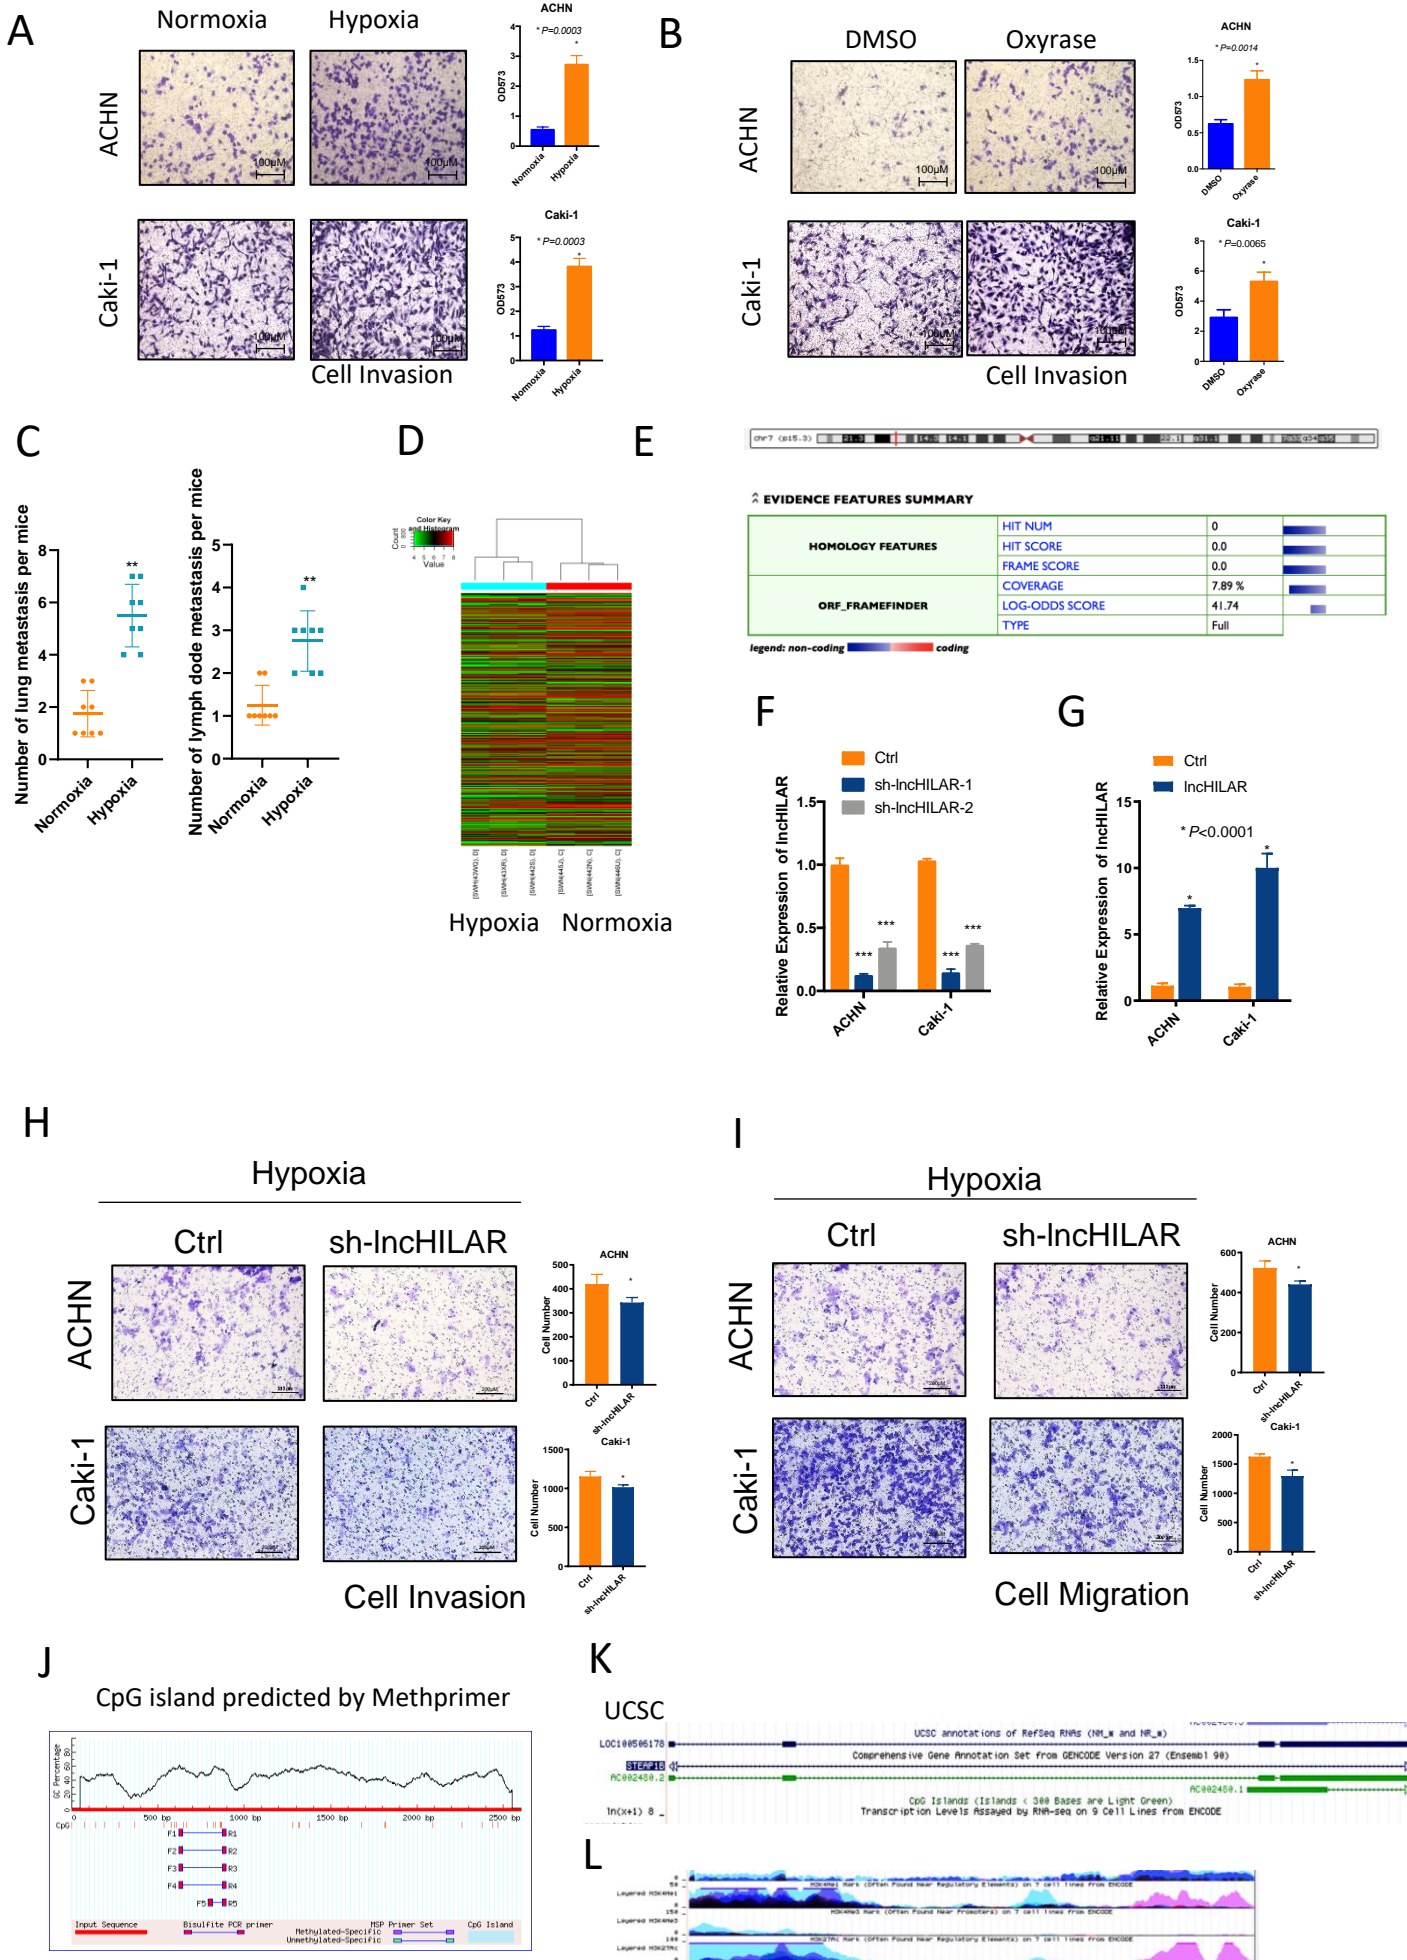

## Figure S1.

A: Cell invasion of ACHN and Caki-1 under hypoxia (0.5% O<sub>2</sub>). n=3, \*P < 0.001.

B: Cell invasion of ACHN and Caki-1 under hypoxia by using Oxyrase (100mM). n=3, \*P < 0.0001.

C: Nude mice were injected into tail vein with normoxic and hypoxic SN12PM6 cells (1x10<sup>6</sup> cells).

Statistical analysis of lung and lymph node metastasis. n=8, \*\*P < 0.001

D: lncRNA microarray data of hypoxic and normoxic cells are presented in a heatmap.

E: Location of lncHILAR on chromosome 7 according to UCSC database (Upper panel) and analysis of coding potential of lncHILAR by Coding potential calculator (Lower panel).

F-G: qRT-PCR analysis of efficiency of shRNA-lncHILAR (F) and overexpression of lncHILAR (G), n=3, \*\*\*P < 0.0001.

H-I: Cell invasion (H) and migration (I) of ACHN and Caki-1 cells under hypoxia after knockdown of lncHILAR. n=3, \*P < 0.05.

J-K: Analysis of CpG island in the promoter area of lncHILAR by Methprimer (H) and UCSC browser (K).

L: lncHILAR located at chromosome 7. Its promoter region was enriched with the H3K4Me1 and H3K27Ac histone mark presented with UCSC data.

# Figure S2

**A**

## IncLocator Database

### The subcellular location of the lncHILAR

| Predicted Location | Score           |
|--------------------|-----------------|
| Cytoplasm:         | 0.673102646638  |
| Nucleus :          | 0.120802166227  |
| Ribosome:          | 0.0327177183141 |
| Cytosol:           | 0.139662668623  |

**B**

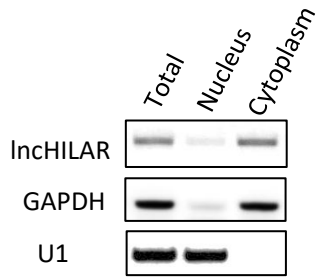

**C**

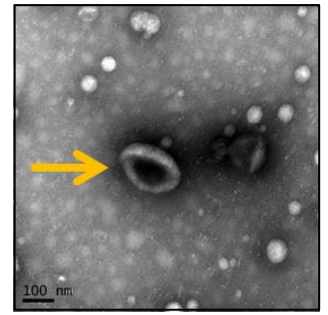

**D**

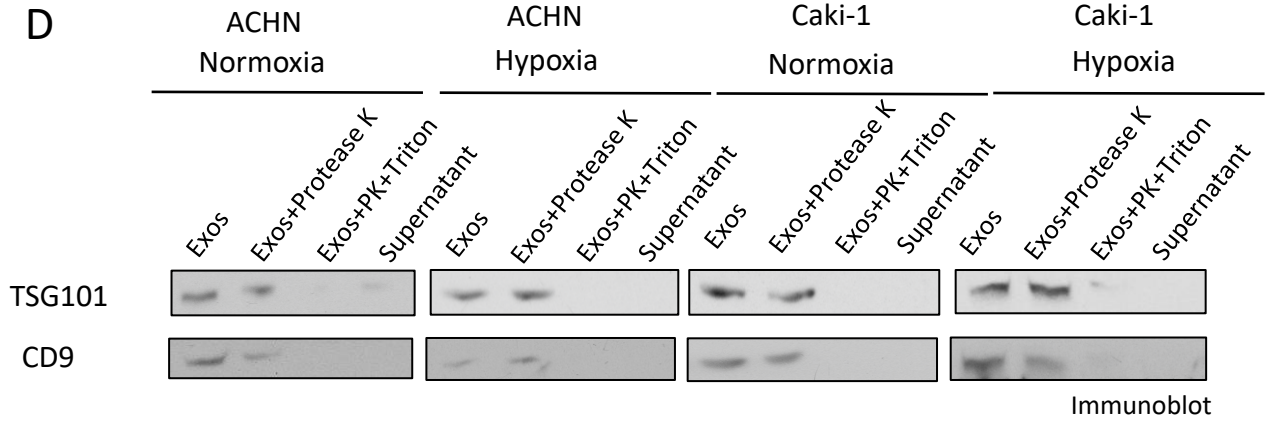

**E**

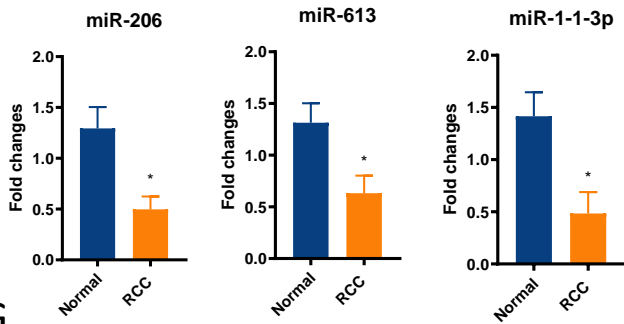

**F**

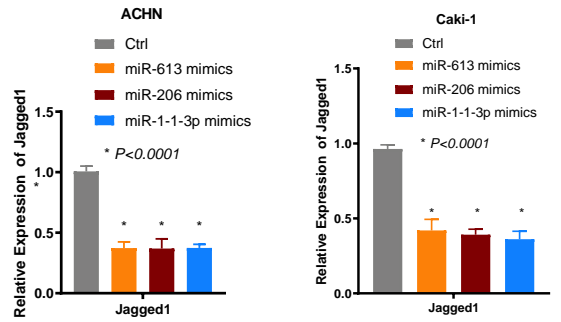

**G**

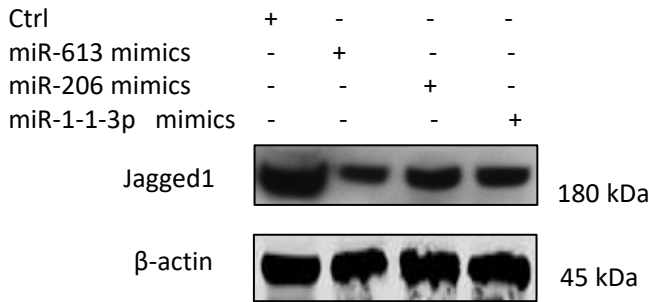

**H**

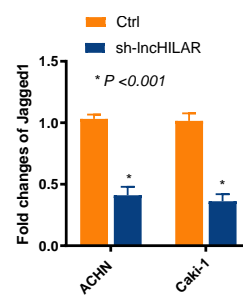

**I**

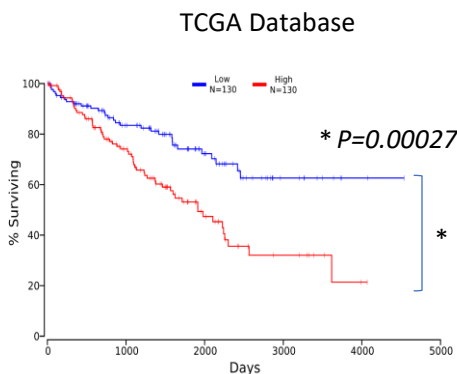

**J**

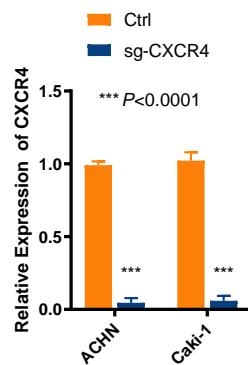

**K**

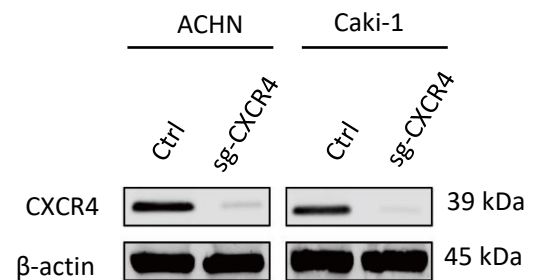

## Figure S2.

A: The subcellular location of lncHILAR was predicted by Inclocator database, presented as a predicted score.

B: The cellular distribution of lncHILAR RNA by qRT-PCR showed that lncHILAR was predominately localized to the cytoplasm.

C: Representative electron microscopy images of exosomes secreted by RCC cells. Scale bar, 100 nm.

D: Immunoblot analysis of TSG101 and CD9 in isolated exosomes.

E: Expression of miR613/206/1-1-3p in RCC samples were determined by qRT-PCR, n=40, \* P<0.0001.

F: qRT-PCR analysis of Jagged1 mRNA in ACHN and Caki-1 cells transfected with Control or miR-613/206/1-1-3p mimics (50nM) for 48 h, n=3, \*P <0.0001.

G: Immunoblot analysis of Jagged1 expression of ACHN and Caki-1 cells transfected with Control or miR-613/206/1-1-3p mimics, n=3.

H: qRT-PCR analysis of Jagged1 mRNA of ACHN and Caki-1 cells after knock-down of lncHILAR, n=3, \*P <0.001.

I: Overall survival of RCC patients in high CXCR4 expression group (n=130) and low CXCR4 expression group(n=130), \*P<0.001. Data was acquired from TCGA database.

J: qRT-PCR analysis of CXCR4 mRNA of Caki-1 cells after knock-out of CXCR4(sg-CXCR4) by CRISPR/Cas9, n=3, \*\*\* P<0.0001.

K: Immunoblot analysis of CXCR4 protein of ACHN and Caki-1 cells after knock-out of CXCR4 by CRISPR/Cas9.

Table1. Oligonucleotide Sequences

| Oligo                     |         | Sequence(5'-3')                                                 |
|---------------------------|---------|-----------------------------------------------------------------|
| lncHILAR                  | shRNA-1 | gatccGCTGTTCTAAGTCATGAATTTCAAGAGAATTCATGACT<br>TAGAACAGCTTTTTTg |
|                           | shRNA-2 | aattcAAAAAAGCTGTTCTAAGTCATGAATTCTCTTGAAATTCA<br>TGACTTAGAACAGCg |
| Jagged1<br>sgRNA          | Forward | TACTATGGCTTTGGCTGCAATA                                          |
| Jagged1<br>sgRNA          | Reverse | CAACAGCATCTTCTACACTCCG                                          |
| CXCR4 sgRNA               | Forward | GGTCATGGGTTACCAGAAGAAA                                          |
| CXCR4 sgRNA               | Reverse | CAGGATGAGGACACTGCTGTAG                                          |
| <b><i>qPCR primer</i></b> |         |                                                                 |
| lncHILAR                  | Forward | CCAGCAGCAACCACATTAGG                                            |
|                           | Reverse | CAAGTGGGTAAGGGGTGACAG                                           |
| miR-613                   | Forward | GGAA TGTTCTTCTTTGC                                              |
|                           | Reverse | GAACATGTCTGCGTATCTC                                             |
| miR-206                   | Forward | GAATGTAAGGAAGTGTGTG                                             |
|                           | Reverse | GAACATGTCTGCGTATCTC                                             |
| miR-1-1-3p                | Forward | TGGAATGTAAAGAAGTATGT                                            |
|                           | Reverse | GAACATGTCTGCGTATCTC                                             |
| Jagged1                   | Forward | TGCTACAACCGTGCCAGTGACT                                          |
|                           | Reverse | TCAGGTGTGTCGTTGGAAGCCA                                          |
| E-cadherin                | Forward | GCCTCCTGAAAAGAGAGTGGAAG                                         |
|                           | Reverse | TGGCAGTGTCTCTCCAAA TCCG                                         |
| N-cadherin                | Forward | CCTCCAGAGTTTACTGCCATGAC                                         |
|                           | Reverse | GTAGGATCTCCGCCACTGATTC                                          |

---

|                |         |                         |
|----------------|---------|-------------------------|
| Zo-1           | Forward | GTCCAGAATCTCGGAAAAGTGCC |
|                | Reverse | CTTTCAGCGCACCATACCAACC  |
| Vimentin       | Forward | AGGCAAAGCAGGAGTCCACTGA  |
|                | Reverse | ATCTGGCGTTCAGGGACTCAT   |
| CXCR4          | Forward | CTCCTCTTTGTCATCACGCTTCC |
|                | Reverse | GGATGAGGACACTGCTGTAGAG  |
| GAPDH          | Forward | GTCTCCTCTGACTTCAACAGCG  |
|                | Reverse | ACCACCCTGTTGCTGTAGCCAA  |
| $\beta$ -actin | Forward | CACCATTGGCAATGAGCGGTTC  |
|                | Reverse | AGGTCTTTGCGGATGTCCACGT  |
| U6             | Forward | CTCGCTTCGGCAGCAC A T    |
|                | Reverse | TTTGC GTGTCA TCCTTGCG   |
| Chip primer    |         |                         |
| Site1          | Forward | GGTGAGGGGCCCTGATTTAT    |
|                | Reverse | GGTGAGGGGCCCTGATTTAT    |
| Site2          | Forward | CCAACTACCCAGGAACCCAT    |
|                | Reverse | CTGCTGAAGGGGTACGACG     |

---
